# Supplementary material for: A new V-shaped triphenylamine/diketopyrrolopyrrole containing donor material for small molecule organic solar cells
Source: Royal Society of Chemistry journal article supplement (doi:10.1039/c5ra07383a), 2015-01-01
Supplement: c5ra07383a1.pdf [file c5ra07383a1.pdf]

## Supporting Information

### A new V-shaped triphenylamine/diketopyrrolopyrrole containing donor material for small molecular organic solar cells†

Shifan Wang, ‡<sup>a</sup> Jie Yang, ‡<sup>ab</sup> Zhiguo Zhang, <sup>b</sup> Yuanyuan Hu, <sup>c</sup> Xudong Cao, <sup>a</sup> Hai Li, <sup>a</sup> Youtian Tao, <sup>\*a</sup> Yongfang Li<sup>\*b</sup> and Wei Huang <sup>\*a</sup>

<sup>a</sup>Key Lab for Flexible Electronics & Institute of Advanced Materials, Jiangsu National Synergistic Innovation Center for Advanced Materials (SICAM), Nanjing Tech University, 30 South Puzhu Road, Nanjing, 211816, China. E-mail: iamyttao@njtech.edu.cn; iamwhuang@njtech.edu.cn.

<sup>b</sup>Chinese Academy of Sciences, Beijing 100190, China. E-mail: liyf@iccas.ac.cn.

<sup>c</sup>Cavendish Laboratory, University of Cambridge, Cambridge CB3 0HE, United Kingdom.

† Electronic Supplementary Information (ESI) available: <sup>1</sup>H NMR, <sup>13</sup>C NMR and MS spectra of TPA(DPPT2)2. See DOI: 10.1039/x0xx00000x

‡These authors contributed equally to this work.

### 1 Supporting Table

**Table S1** Photovoltaic parameters of solar cells based on TPA(DPPT2)2: PC71BM(1: 1, w/w) blends

| Devices | $V_{OC}$ | $J_{SC}$ (mA cm <sup>-2</sup> ) | $FF$ (%) | PCE (%) |
|---------|----------|---------------------------------|----------|---------|
| 1       | 0.74     | 4.68                            | 37       | 1.30    |
| 2       | 0.73     | 5.01                            | 67       | 1.39    |
| 3       | 0.70     | 5.08                            | 34       | 1.19    |
| 4       | 0.72     | 5.11                            | 37       | 1.37    |

**Table S2** Photovoltaic parameters of solar cells based on TPA(DPPT2)2: PC71BM(1: 1, w/w) blends and 0.1% DIO as a processing additives.

| Devices | $V_{OC}$ | $J_{SC}$ (mA cm <sup>-2</sup> ) | $FF$ (%) | PCE (%) |
|---------|----------|---------------------------------|----------|---------|
| 1       | 0.64     | 9.12                            | 61       | 3.53    |
| 2       | 0.64     | 9.37                            | 61       | 3.67    |
| 3       | 0.64     | 9.48                            | 63       | 3.81    |
| 4       | 0.64     | 9.35                            | 62       | 3.71    |
| 5       | 0.64     | 9.28                            | 62       | 3.69    |
| 6       | 0.64     | 9.20                            | 63       | 3.69    |

**Table S3** Photovoltaic parameters of solar cells based on TPA(DPPT2)2: PC71BM(1: 1, w/w) blends and 0.2% DIO as a processing additives.

| Devices | $V_{OC}$ | $J_{SC}$ (mA cm <sup>-2</sup> ) | $FF$ (%) | PCE (%) |
|---------|----------|---------------------------------|----------|---------|
| 1       | 0.63     | 9.82                            | 57       | 3.51    |
| 2       | 0.64     | 9.88                            | 59       | 3.70    |
| 3       | 0.62     | 10.17                           | 58       | 3.69    |
| 4       | 0.62     | 9.89                            | 58       | 3.60    |
| 5       | 0.62     | 10.34                           | 54       | 3.44    |
| 6       | 0.62     | 10.30                           | 55       | 3.55    |

**Table S4** Photovoltaic parameters of solar cells based on TPA(DPPT2)2: PC71BM(1: 1, w/w) blends and 0.3% DIO as a processing additives.

| Devices | $V_{OC}$ | $J_{SC}$ (mA cm <sup>-2</sup> ) | $FF$ (%) | PCE (%) |
|---------|----------|---------------------------------|----------|---------|
| 1       | 0.64     | 9.38                            | 58       | 3.54    |
| 2       | 0.64     | 9.50                            | 59       | 3.60    |
| 3       | 0.65     | 9.46                            | 59       | 3.64    |
| 4       | 0.65     | 9.57                            | 57       | 3.55    |
| 5       | 0.64     | 9.37                            | 60       | 3.61    |
| 6       | 0.64     | 9.58                            | 56       | 3.44    |

**Table S5** Photovoltaic parameters of solar cells based on TPA(DPPT2)2: PC71BM(1: 1, w/w) blends and 0.5% DIO as a processing additives.

| Devices | $V_{OC}$ | $J_{SC}$ (mA cm <sup>-2</sup> ) | $FF$ (%) | PCE (%) |
|---------|----------|---------------------------------|----------|---------|
| 1       | 0.64     | 8.87                            | 52       | 2.93    |
| 2       | 0.64     | 9.47                            | 51       | 3.06    |
| 3       | 0.63     | 8.68                            | 51       | 2.83    |
| 4       | 0.62     | 8.74                            | 51       | 2.72    |
| 5       | 0.63     | 8.98                            | 51       | 2.90    |
| 6       | 0.63     | 8.89                            | 50       | 2.82    |

**Table S6** Photovoltaic parameters of solar cells based on TPA(DPPT2)2: PC71BM(1: 1, w/w) blends and 0.7% DIO as a processing additives.

| Devices | $V_{OC}$ | $J_{SC}$ (mA cm <sup>-2</sup> ) | $FF$ (%) | PCE (%) |
|---------|----------|---------------------------------|----------|---------|
| 1       | 0.64     | 9.76                            | 47       | 2.98    |
| 2       | 0.63     | 9.79                            | 46       | 2.82    |
| 3       | 0.64     | 9.50                            | 48       | 2.87    |
| 4       | 0.65     | 9.26                            | 44       | 2.65    |

## 2 Supporting Figure

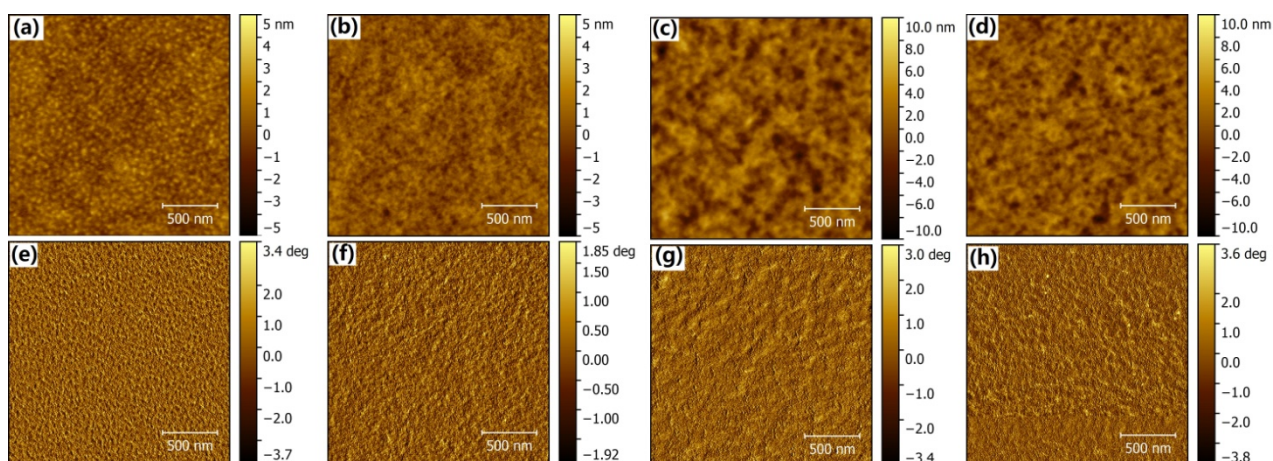

Fig. S1 AFM topography (top) and phase (bottom) images ( $2 \mu\text{m} \times 2 \mu\text{m}$ ) of blend film: TPA(DPPT2)2:PC<sub>71</sub>BM with (a, e) 0% DIO, (b, f) 0.1% DIO, (c, g) 0.2% DIO, (d, h) 0.5% DIO.

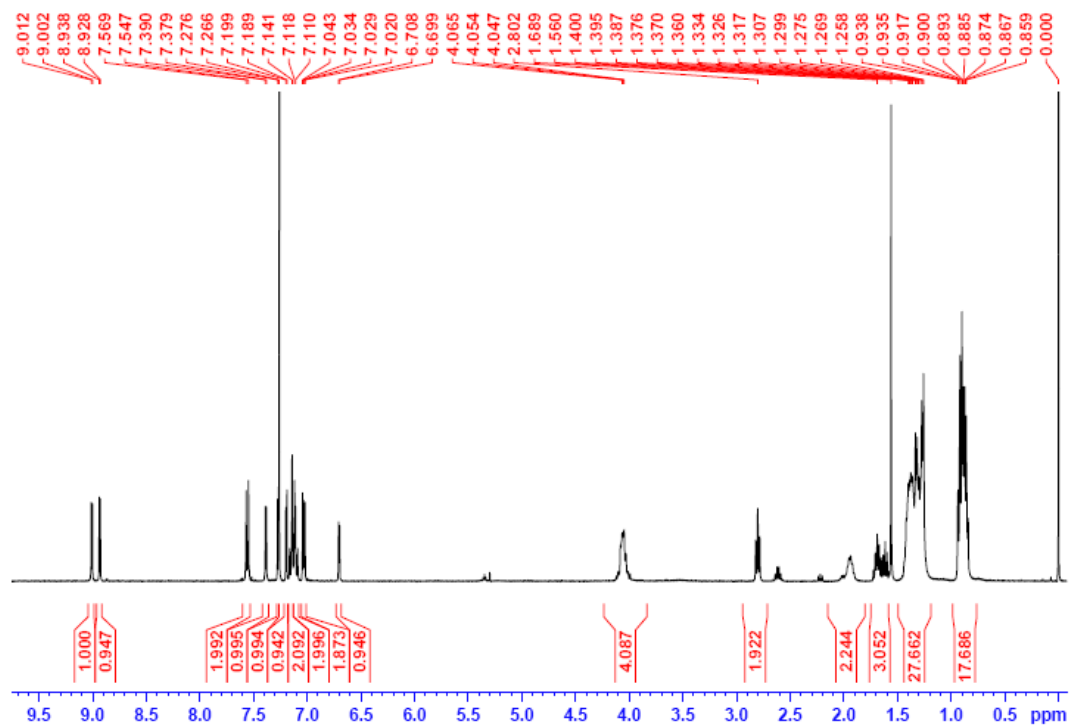

Fig.S1  $^1\text{H}$  NMR spectra of TPA(DPPT)2

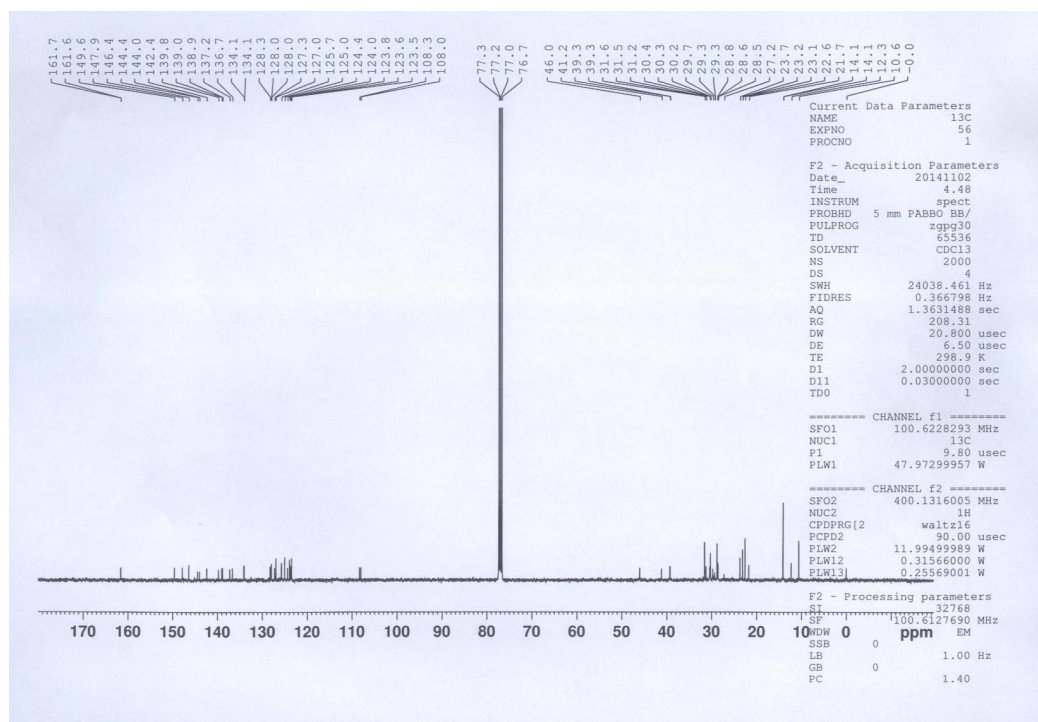

Fig.S2  $^{13}\text{C}$  NMR spectra of TPA(DPPT)2

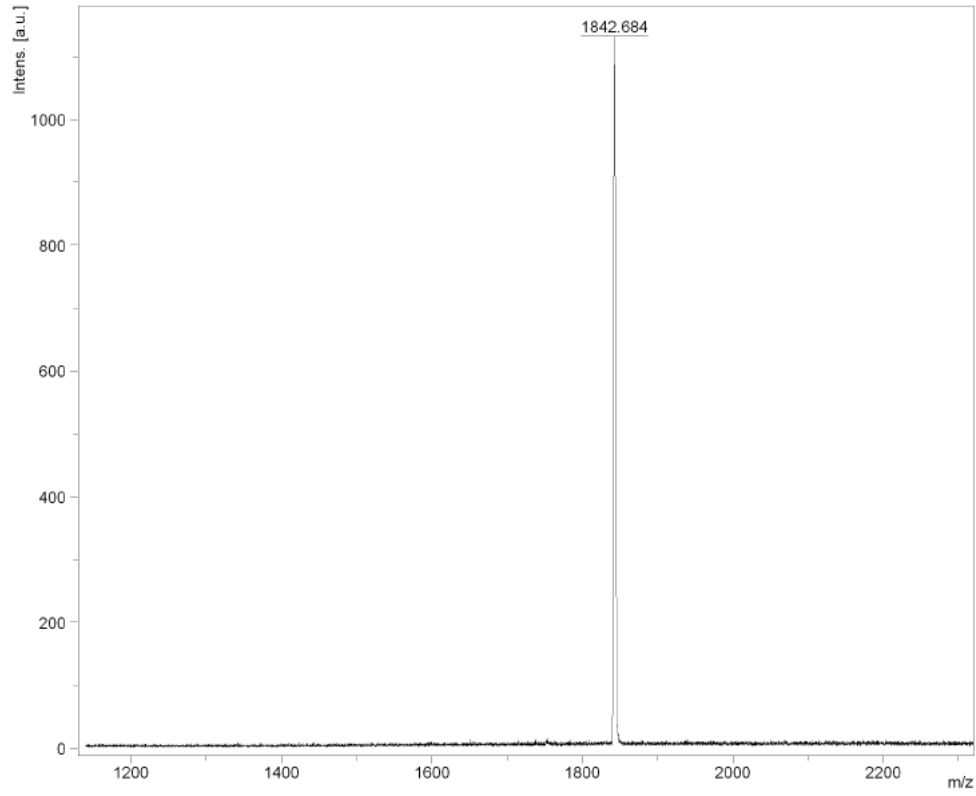

**Acquisition Parameter**

Date of acquisition 2014-05-22T12:14:58.765+08:00  
Acquisition method name D:\Methods\FlexControlMethods\RP\_700-3500\_Da.par  
Acquisition operation mode Reflector  
Voltage polarity POS  
Number of shots 500  
Name of spectrum used for calibration  
Calibration reference list used

**Fig.S3 MS spectra of TPA(DPPT2)2**
